# Supplementary material
Source: PubMed Central journal article supplement (PMC3335386)

**Supplementary Figure 1: Recruitment of elongation components to the  $\beta$ -globin locus in erythroid cells from mice with LCR HS deletions.** ChIP was performed on WT and LCR mutant chromatin using antibodies to FACT component SPT16 (A) and DSIF component SPT5 (B). Three different chromatin preparations were analyzed by quantitative PCR of the  $\beta$ -major globin start site ( $\beta$ -Start) and exon-2 of  $\beta$ -major ( $\beta$ -Ex2) regions and normalized to Necdin, which is not transcribed in these cells. (\* denotes  $P < 0.05$  and \*\* denotes  $P < 0.001$  relative to WT). Error bars represent the standard error of the mean.

# Supplementary Figure 1

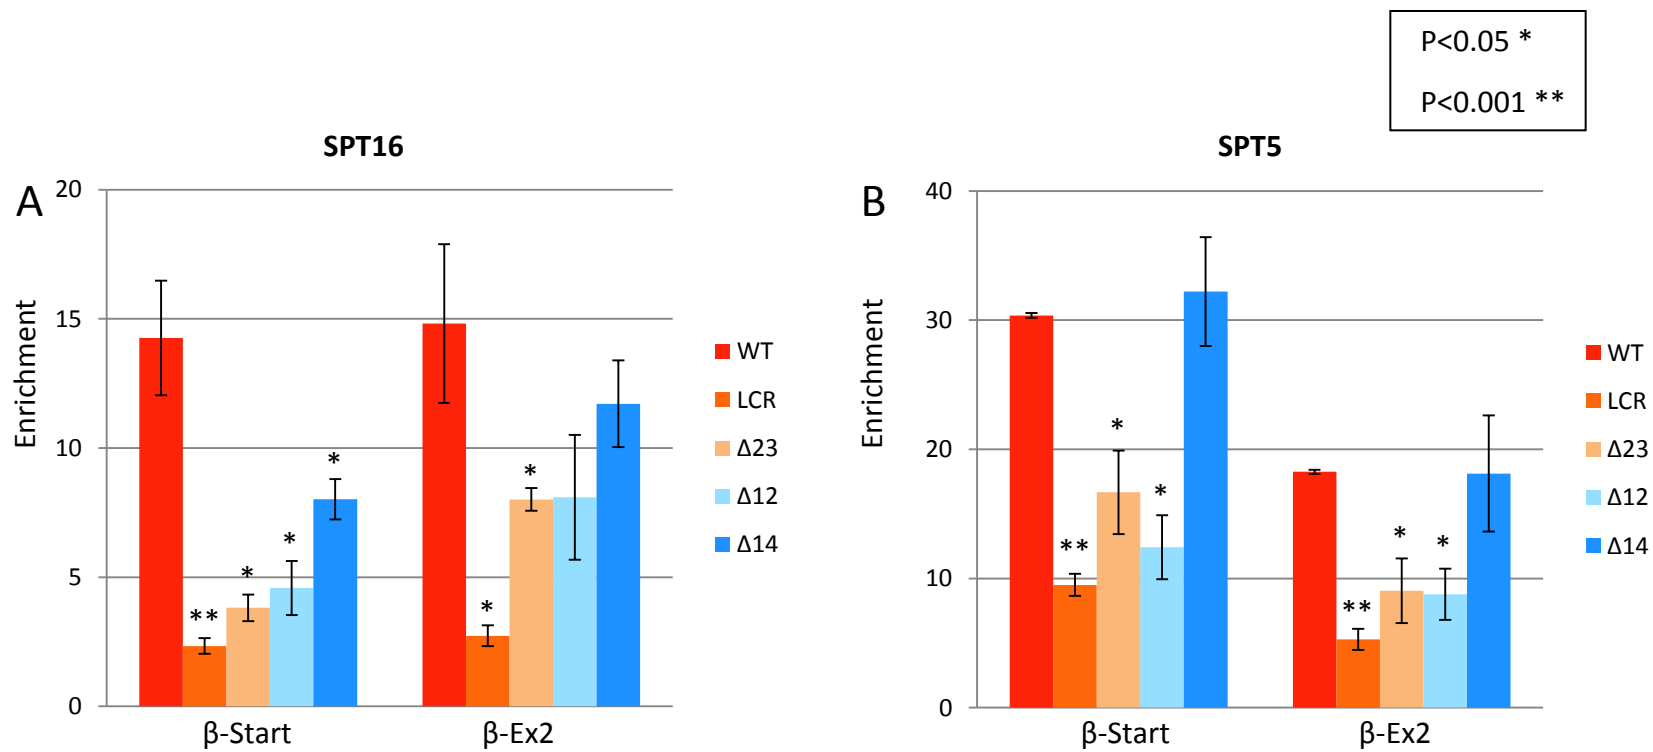

Supplement: supp_blood-2011-09-380485_blood-2011-09-380485-1.pdf [file supp_blood-2011-09-380485_blood-2011-09-380485-1.pdf]
